# Supplementary material for: Genomic analysis of a pre-elimination Malaysian Plasmodium vivax population reveals selective pressures and changing transmission dynamics
Source: Nat Commun. 2018 Jul 3;9:2585. doi: 10.1038/s41467-018-04965-4 (PMC6030216; doi:10.1038/s41467-018-04965-4)
Supplement: Supplementary file 1 — Supplementary Information [file 41467_2018_4965_MOESM1_ESM.pdf]

## Supplementary Information

### Supplementary Figures

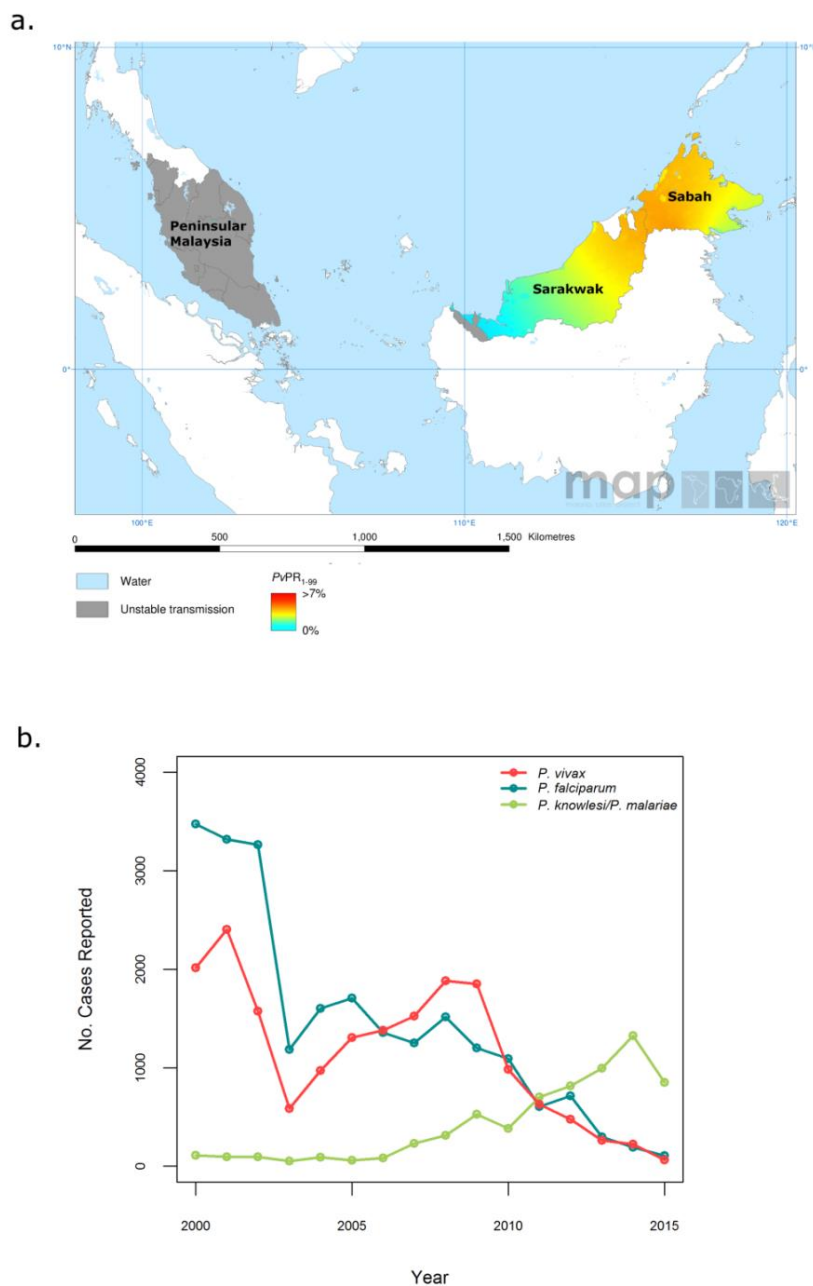

**Supplementary Figure 1. *P. vivax* prevalence and incidence in Sabah.** Panel a) provides a *P. vivax* prevalence map for Malaysia generated by the Malaria Atlas Project. The colour scales reflect the model-based geostatistical point estimates of the annual mean *P. vivax* parasite rate in the 1-99 year

age range ( $PvPR_{1-99}$ ) within the stable spatial limits of transmission in 2010. All Malaria Atlas Project maps are available to users under the Creative Commons Attribution License CCAL 3.0. [<http://www.map.ox.ac.uk/about-map/open-access/>]. Panel b) illustrates the annual number of reported cases of *P. vivax*, *P. falciparum* and *P. knowlesi*/*P. malariae* in Sabah between 2000 and 2015. The data was provided by the Sabah Department of Health. Based on population size data provided by the Malaysian Department of Statistics, the annual *P. vivax* incidence (per 1000 population) was approximately 0.78 in 2000, 0.32 in 2010 and 0.02 in 2015.

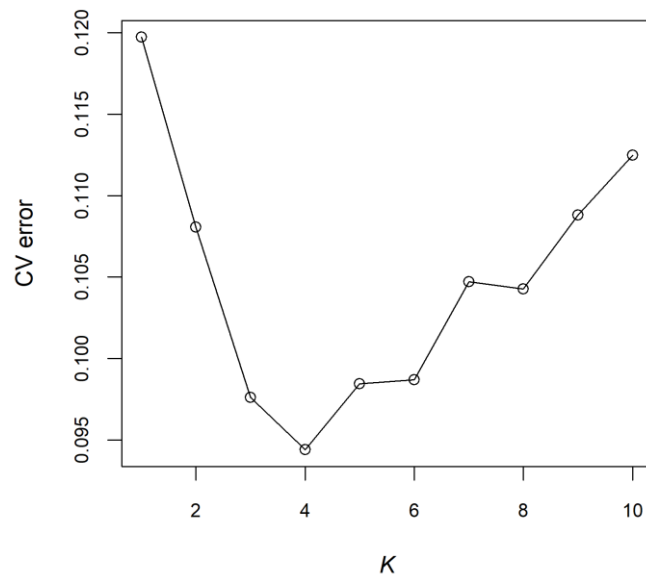

**Supplementary Figure 2. Admixture cross-validation errors for estimates of  $K$  1 to 10 in the country-wide sample set.** Analysis was performed on the full data set ( $n=259$  samples). The lowest cross-validation error was observed at  $K = 4$  (CV=0.094).

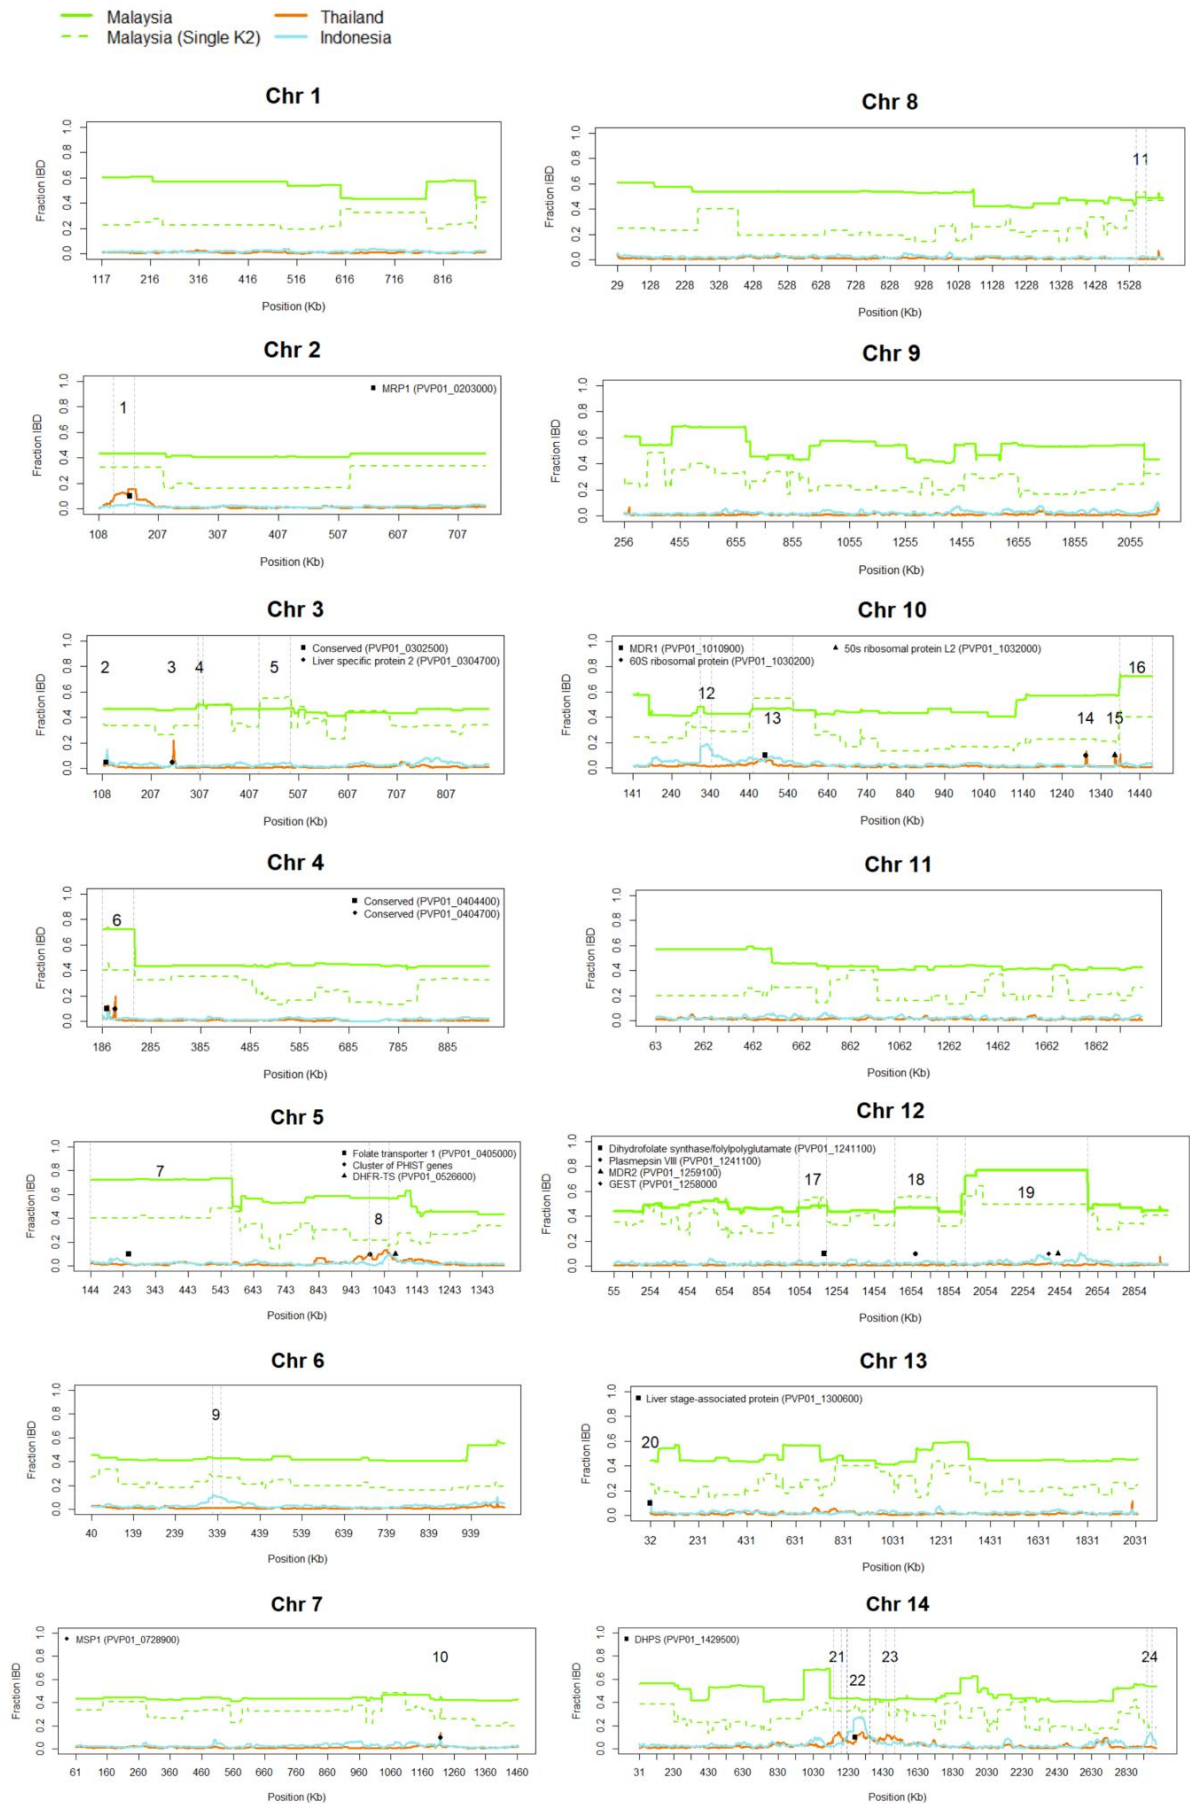

**Supplementary Figure 3. Fraction of sample pairs that are IBD along each chromosome in Malaysia, Thailand and Indonesia.** Each plot presents the fraction of pairwise samples that are IBD for each population at 1 Kb intervals along the accessible (mappable) regions of the given chromosome. Analyses were conducted on monoclonal samples ( $F_{ws} \geq 0.95$ ). In Malaysia, analyses were conducted on all samples excluding the 3 putatively imported cases (All) and additionally with single representation of the K2 strain (Single K2). Markedly higher levels of IBD were observed in the Malaysian samples than the Indonesian and Thai samples across the genome. Regions supported by a minimum of two adjacent positions among the top 5% IBD fractions in Malaysia and the top 1% fractions in each of Thailand and Indonesia are numbered from 1-24, with the boundaries of regions exceeding 10 Kb demarked by dashed grey lines. Gene annotations are provided where regions encompass a single gene or a biologically plausible drug resistance candidate. Region 1 (chr2, 126-161 Kb) spans 6 genes; region 2 (chr3, 116-117 Kb) spans 1 gene; region 3 (chr3, 251-252 Kb) spans 1 gene; region 4 (chr3, 303-313 Kb) spans 4 genes; region 5 (chr3, 427-491 Kb) spans 22 genes; region 6 (chr4, 186-250 Kb) spans 13 genes; region 7 (chr5, 144-576 Kb) spans 104 genes; region 8 (chr5, 997-1058 Kb) spans 16 genes; region 9 (chr6, 327-347 Kb) spans 3 genes; region 10 (chr7, 1216-1218 Kb) spans 1 gene; region 11 (chr8, 1550-1577 Kb) spans 6 genes; region 12 (chr10, 314-343 Kb) spans 4 genes; region 13 (chr10, 449-551 Kb) spans 20 genes; region 14 (chr10, 1302-1303 Kb) spans 1 gene; region 15 (chr10, 1376-1377 Kb) spans 1 gene; region 16 (chr10, 1389-1472 Kb) spans 19 genes; region 17 (chr12, 1051-1199 Kb) spans 37 genes; region 18 (chr12, 1566-1792 Kb) spans 48 genes; region 19 (chr12, 1942-2599 Kb) spans 153 genes; region 20 (chr13, 32-33 Kb) spans 1 gene; region 21 (chr14, 1150-1191 Kb) spans 9 genes; region 22 (chr14, 1224-1356 Kb) spans 24 genes; region 23 (chr14, 1449-1499 Kb) spans 19 genes; and region 24 (chr14, 2949-2978 Kb) spans 2 genes.

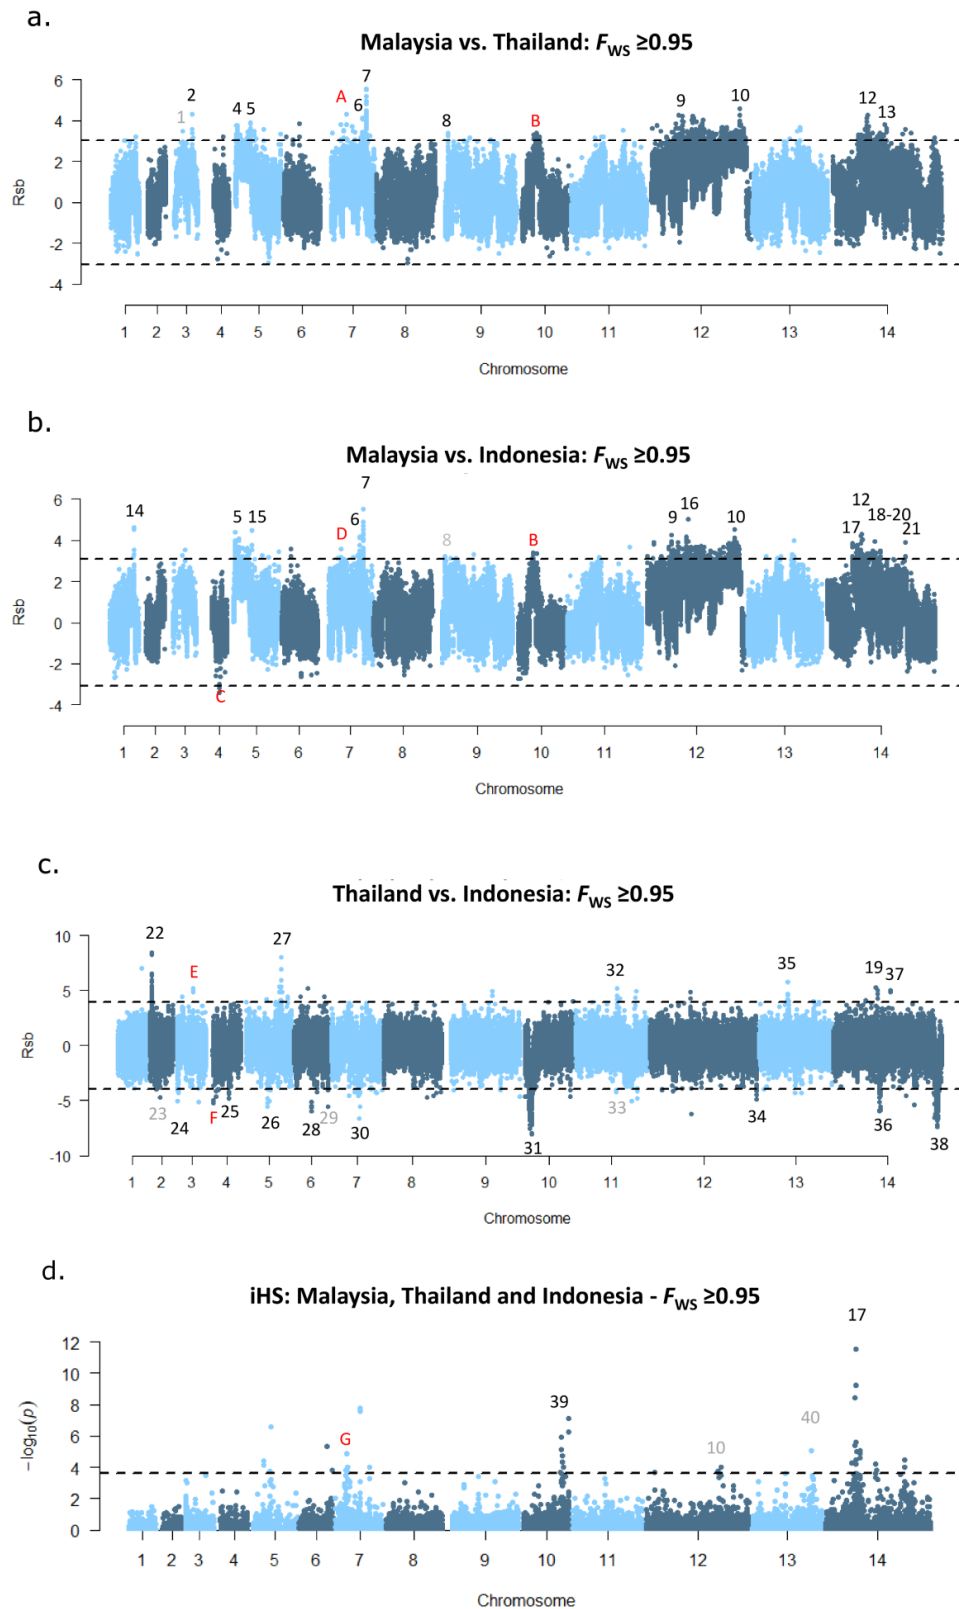

**Supplementary Figure 4. Genome-wide scans to identify regions with extended haplotype homozygosity using monoclonal samples. Panels a), b) and c) present Manhattan plots of the *Rsb***

index for the given populations, and panel d) presents the *iHS* *p-value* for the pooled populations. Analyses were conducted on monoclonal samples ( $F_{WS} \geq 0.95$ ). The dashed black lines demark the top 0.5% SNPs with the most significant *p-values*. The dashed grey line in panel d) demarks the top 1% SNPs. Regions with  $\geq 3$  SNPs and with 1-2 SNPs within 80 Kb of one another and overall SNP density < 10 Kb per SNP amongst the top 0.5% SNPs that were also identified in the low complexity samples ( $F_{WS} \geq 0.60$ ) are numbered in black and grey respectively. Details on these regions are provided in Figure 6. Seven new multi-SNP signals observed in the monoclonal dataset are labelled with red letters A-G. Signals A, B, E, F and G are reflected by 1-2 SNPs in the low-complexity data and hence are represented in Supplementary Tables 6 and 7. Signal C encompasses a conserved gene (PVP01\_0415400), and signal D is an intergenic region with no clear candidates. Overall, there are no major differences in the monoclonal and low-complexity datasets.

## Supplementary Tables

**Supplementary Table 1. Demographic summary of the patients with successfully genotyped samples**

| Year             | No. patients | Median age<br>(Range) | % Males    | Median parasite density, $\mu\text{L}^{-1}$<br>(Range) |
|------------------|--------------|-----------------------|------------|--------------------------------------------------------|
| 2010             | 24           | 23 (13-63)            | 83%        | 5,642 (929-57,000) <sup>8</sup>                        |
| 2011             | 32           | 20.5 (4-79)           | 72%        | 3,152 (120-10,160) <sup>10</sup>                       |
| 2012             | 18           | 30.5 (4-71)           | 72%        | 2,124 (179-5,700) <sup>7</sup>                         |
| 2013             | 26           | 11 (2-42)             | 58%        | 5,279 (249-24,400)                                     |
| 2014             | 105          | 17 (2-68)             | 69%        | 3,882 (91-140,500)                                     |
| 2015             | 7            | 32 (2-70)             | 71%        | 6,767 (77-36250)                                       |
| <b>2010-2015</b> | <b>212</b>   | <b>19 (2-79)</b>      | <b>70%</b> | <b>3,995 (77-140,500)<sup>25</sup></b>                 |

Superscript denotes number of patients with missing data

**Supplementary Table 2. Temporal trends in within-host and population level diversity using the STR genotyping data**

| Year | No. samples | No. unique MLGs | No. low complexity samples (%)* | No. polyclonal samples (%) | Mean MOI, median (range) | Median <i>Rs</i> (range) | Median <i>Rs</i> of unique MLGs (range) | Median <i>Rs</i> of low complexity samples (range) |
|------|-------------|-----------------|---------------------------------|----------------------------|--------------------------|--------------------------|-----------------------------------------|----------------------------------------------------|
| 2010 | 24          | 17              | 22 (92%)                        | 12 (50%)                   | 1.54, 1.5 (1-3)          | 4.98 (3.94-8.67)         | 4.89 (3.90-7.49)                        | 4.93 (3.75-8.73)                                   |
| 2011 | 32          | 23              | 26 (81%)                        | 9 (28%)                    | 1.34, 1 (1-3)            | 6.51 (4.40-8.65)         | 6.02 (4.17-7.63)                        | 6.11 (4.45-7.93)                                   |
| 2012 | 18          | 16              | 17 (94%)                        | 3 (17%)                    | 1.17, 1 (1-2)            | 8.00 (3.89-10.20)        | 6.67 (3.59-7.59)                        | 7.88 (3.88-9.38)                                   |
| 2013 | 26          | 12              | 25 (96%)                        | 4 (15%)                    | 1.15, 1 (1-2)            | 3.91 (3.00-5.91)         | 4.64 (3.00-6.15)                        | 3.60 (2.99-5.94)                                   |
| 2014 | 105         | 16              | 104 (99%)                       | 8 (8%)                     | 1.08, 1 (1-2)            | 2.51 (2.21-4.22)         | 4.46 (3.48-6.21)                        | 2.37 (2.16-4.14)                                   |

\*No. samples with a maximum of 1 multi-allelic locus

**Supplementary Table 3. Temporal trends in linkage disequilibrium using the STR genotyping data**

| Year | No. samples with complete MLGs | $r_A^S$ on all complete MLGs | No. unique MLGs <sup>1</sup> | $r_A^S$ unique MLGs | No. low complexity samples <sup>2</sup> | $r_A^S$ low complexity MLGs |
|------|--------------------------------|------------------------------|------------------------------|---------------------|-----------------------------------------|-----------------------------|
| 2010 | 16                             | 0.486 **                     | 11                           | 0.230 **            | 15                                      | 0.529 **                    |
| 2011 | 27                             | 0.478 **                     | 18                           | 0.116 **            | 21                                      | 0.613 **                    |
| 2012 | 13                             | 0.167 **                     | 11                           | 0.019 *             | 12                                      | 0.179 **                    |
| 2013 | 21                             | 0.536 **                     | 9                            | 0.258 **            | 21                                      | 0.536 **                    |
| 2014 | 103                            | 0.366 **                     | 15                           | 0.285 **            | 102                                     | 0.373 **                    |

<sup>1</sup> No. unique MLGs in the samples with complete genotyping data. <sup>2</sup> No. samples with a maximum of one multi-allelic locus with complete MLGs. (Monte Carlo simulation, \* $p < 0.05$ . \*\* $p < 0.01$ ).

**Supplementary Table 4. Demographic details of Individuals with ‘outbreak’ *P. vivax* strains relative to other cases**

|                                                                         | <b>K2 (MLG38)</b>  | <sup>a</sup> <b>Other high frequency MLGs</b> | <sup>b</sup> <b>Low frequency MLGs</b> |
|-------------------------------------------------------------------------|--------------------|-----------------------------------------------|----------------------------------------|
| <b>Cases, <i>n</i></b>                                                  | 68                 | 52                                            | 67                                     |
| <b>Age in years, median (range)</b>                                     | 15 (2-68)          | 18 (3-45)                                     | 24 (2-79)                              |
| <b>Males, <i>n</i> (%)</b>                                              | 42 (62%)           | 38 (73%)                                      | 49 (73%)                               |
| <b>Parasite density (<math>\mu\text{l}^{-1}</math>), median (range)</b> | 4,180 (77-140,500) | 3,690 (91-42,520) <sup>5</sup>                | 4,186 (120-57,000) <sup>15</sup>       |
| <b>Unknown occupation (missing data), <i>n</i> (%)</b>                  | 0/68 (0%)          | 1/52 (2%)                                     | 4/67 (11%)                             |
| <b>Farmer, rubber tapper, forestry or plantation worker</b>             | 20/68 (29%)        | 22/51 (43%)                                   | 23/63 (37%)                            |
| <b>Student, <i>n</i> (%)</b>                                            | 25/68 (37%)        | 14/51 (27%)                                   | 10/63 (16%)                            |
| <b>Other occupation, <i>n</i> (%)</b>                                   | 10/68 (15%)        | 4/51 (8%)                                     | 21/63 (33%)                            |
| <b>Unemployed, <i>n</i> (%)</b>                                         | 13/68 (19%)        | 11/51 (22%)                                   | 9/63 (14%)                             |

<sup>a</sup> MLGs observed in 5 or more Independent cases (excluding K2 (MLG38)), including MLGs 39, 43, 44, 45, 46, 49, 50, 52, 55. <sup>b</sup> MLGs observed in less than 5 Independent cases. <sup>5-20</sup> Number of Individuals with missing data.

**Supplementary Table 5. European Nucleotide Archive run accession codes for the new *P. vivax* sequence data from Malaysia**

| Sample ID | Run accession | URL                                                                                                             |
|-----------|---------------|-----------------------------------------------------------------------------------------------------------------|
| PY0002-C  | ERR054089     | [ <a href="https://www.ebi.ac.uk/ena/data/view/ERR054089">https://www.ebi.ac.uk/ena/data/view/ERR054089</a> ]   |
| PY0004-C  | ERR152414     | [ <a href="https://www.ebi.ac.uk/ena/data/view/ERR152414">https://www.ebi.ac.uk/ena/data/view/ERR152414</a> ]   |
| PY0005-C  | ERR152415     | [ <a href="https://www.ebi.ac.uk/ena/data/view/ERR152415">https://www.ebi.ac.uk/ena/data/view/ERR152415</a> ]   |
| PY0018-C  | ERR527337     | [ <a href="https://www.ebi.ac.uk/ena/data/view/ERR527337">https://www.ebi.ac.uk/ena/data/view/ERR527337</a> ]   |
| PY0019-C  | ERR527363     | [ <a href="https://www.ebi.ac.uk/ena/data/view/ERR527363">https://www.ebi.ac.uk/ena/data/view/ERR527363</a> ]   |
| PY0023-C  | ERR1138855    | [ <a href="https://www.ebi.ac.uk/ena/data/view/ERR1138855">https://www.ebi.ac.uk/ena/data/view/ERR1138855</a> ] |
| PY0024-C  | ERR1138856    | [ <a href="https://www.ebi.ac.uk/ena/data/view/ERR1138856">https://www.ebi.ac.uk/ena/data/view/ERR1138856</a> ] |
| PY0026-C  | ERR1138857    | [ <a href="https://www.ebi.ac.uk/ena/data/view/ERR1138857">https://www.ebi.ac.uk/ena/data/view/ERR1138857</a> ] |
| PY0027-C  | ERR1138858    | [ <a href="https://www.ebi.ac.uk/ena/data/view/ERR1138858">https://www.ebi.ac.uk/ena/data/view/ERR1138858</a> ] |
| PY0034-C  | ERR1138861    | [ <a href="https://www.ebi.ac.uk/ena/data/view/ERR1138861">https://www.ebi.ac.uk/ena/data/view/ERR1138861</a> ] |
| PY0035-C  | ERR1138862    | [ <a href="https://www.ebi.ac.uk/ena/data/view/ERR1138862">https://www.ebi.ac.uk/ena/data/view/ERR1138862</a> ] |
| PY0042-C  | ERR1138864    | [ <a href="https://www.ebi.ac.uk/ena/data/view/ERR1138864">https://www.ebi.ac.uk/ena/data/view/ERR1138864</a> ] |
| PY0044-C  | ERR1138865    | [ <a href="https://www.ebi.ac.uk/ena/data/view/ERR1138865">https://www.ebi.ac.uk/ena/data/view/ERR1138865</a> ] |
| PY0045-C  | ERR1138866    | [ <a href="https://www.ebi.ac.uk/ena/data/view/ERR1138866">https://www.ebi.ac.uk/ena/data/view/ERR1138866</a> ] |
| PY0048-C  | ERR1138867    | [ <a href="https://www.ebi.ac.uk/ena/data/view/ERR1138867">https://www.ebi.ac.uk/ena/data/view/ERR1138867</a> ] |
| PY0050-C  | ERR1138868    | [ <a href="https://www.ebi.ac.uk/ena/data/view/ERR1138868">https://www.ebi.ac.uk/ena/data/view/ERR1138868</a> ] |
| PY0051-C  | ERR1106842    | [ <a href="https://www.ebi.ac.uk/ena/data/view/ERR1106842">https://www.ebi.ac.uk/ena/data/view/ERR1106842</a> ] |
| PY0053-C  | ERR1138869    | [ <a href="https://www.ebi.ac.uk/ena/data/view/ERR1138869">https://www.ebi.ac.uk/ena/data/view/ERR1138869</a> ] |
| PY0054-C  | ERR1138870    | [ <a href="https://www.ebi.ac.uk/ena/data/view/ERR1138870">https://www.ebi.ac.uk/ena/data/view/ERR1138870</a> ] |
| PY0055-C  | ERR1138871    | [ <a href="https://www.ebi.ac.uk/ena/data/view/ERR1138871">https://www.ebi.ac.uk/ena/data/view/ERR1138871</a> ] |
| PY0056-C  | ERR1138872    | [ <a href="https://www.ebi.ac.uk/ena/data/view/ERR1138872">https://www.ebi.ac.uk/ena/data/view/ERR1138872</a> ] |
| PY0057-C  | ERR1138873    | [ <a href="https://www.ebi.ac.uk/ena/data/view/ERR1138873">https://www.ebi.ac.uk/ena/data/view/ERR1138873</a> ] |
| PY0058-C  | ERR1106843    | [ <a href="https://www.ebi.ac.uk/ena/data/view/ERR1106843">https://www.ebi.ac.uk/ena/data/view/ERR1106843</a> ] |
| PY0060-C  | ERR1138875    | [ <a href="https://www.ebi.ac.uk/ena/data/view/ERR1138875">https://www.ebi.ac.uk/ena/data/view/ERR1138875</a> ] |
| PY0061-C  | ERR1138876    | [ <a href="https://www.ebi.ac.uk/ena/data/view/ERR1138876">https://www.ebi.ac.uk/ena/data/view/ERR1138876</a> ] |
| PY0067-C  | ERR1138879    | [ <a href="https://www.ebi.ac.uk/ena/data/view/ERR1138879">https://www.ebi.ac.uk/ena/data/view/ERR1138879</a> ] |
| PY0068-C  | ERR1106846    | [ <a href="https://www.ebi.ac.uk/ena/data/view/ERR1106846">https://www.ebi.ac.uk/ena/data/view/ERR1106846</a> ] |
| PY0072-C  | ERR1138881    | [ <a href="https://www.ebi.ac.uk/ena/data/view/ERR1138881">https://www.ebi.ac.uk/ena/data/view/ERR1138881</a> ] |
| PY0073-C  | ERR1138882    | [ <a href="https://www.ebi.ac.uk/ena/data/view/ERR1138882">https://www.ebi.ac.uk/ena/data/view/ERR1138882</a> ] |
| PY0074-C  | ERR1138883    | [ <a href="https://www.ebi.ac.uk/ena/data/view/ERR1138883">https://www.ebi.ac.uk/ena/data/view/ERR1138883</a> ] |
| PY0075-C  | ERR1138884    | [ <a href="https://www.ebi.ac.uk/ena/data/view/ERR1138884">https://www.ebi.ac.uk/ena/data/view/ERR1138884</a> ] |
| PY0076-C  | ERR1138885    | [ <a href="https://www.ebi.ac.uk/ena/data/view/ERR1138885">https://www.ebi.ac.uk/ena/data/view/ERR1138885</a> ] |
| PY0085-C  | ERR1475425    | [ <a href="https://www.ebi.ac.uk/ena/data/view/ERR1475425">https://www.ebi.ac.uk/ena/data/view/ERR1475425</a> ] |
| PY0087-C  | ERR1475427    | [ <a href="https://www.ebi.ac.uk/ena/data/view/ERR1475427">https://www.ebi.ac.uk/ena/data/view/ERR1475427</a> ] |
| PY0088-C  | ERR1475395    | [ <a href="https://www.ebi.ac.uk/ena/data/view/ERR1475395">https://www.ebi.ac.uk/ena/data/view/ERR1475395</a> ] |
| PY0089-C  | ERR1475451    | [ <a href="https://www.ebi.ac.uk/ena/data/view/ERR1475451">https://www.ebi.ac.uk/ena/data/view/ERR1475451</a> ] |
| PY0090-C  | ERR1475441    | [ <a href="https://www.ebi.ac.uk/ena/data/view/ERR1475441">https://www.ebi.ac.uk/ena/data/view/ERR1475441</a> ] |
| PY0092-C  | ERR1475396    | [ <a href="https://www.ebi.ac.uk/ena/data/view/ERR1475396">https://www.ebi.ac.uk/ena/data/view/ERR1475396</a> ] |
| PY0093-C  | ERR1475397    | [ <a href="https://www.ebi.ac.uk/ena/data/view/ERR1475397">https://www.ebi.ac.uk/ena/data/view/ERR1475397</a> ] |
| PY0094-C  | ERR1475398    | [ <a href="https://www.ebi.ac.uk/ena/data/view/ERR1475398">https://www.ebi.ac.uk/ena/data/view/ERR1475398</a> ] |
| PY0096-C  | ERR1475399    | [ <a href="https://www.ebi.ac.uk/ena/data/view/ERR1475399">https://www.ebi.ac.uk/ena/data/view/ERR1475399</a> ] |

|          |            |                                                                                                                 |
|----------|------------|-----------------------------------------------------------------------------------------------------------------|
| PY0099-C | ERR1475418 | [ <a href="https://www.ebi.ac.uk/ena/data/view/ERR1475418">https://www.ebi.ac.uk/ena/data/view/ERR1475418</a> ] |
| PY0100-C | ERR1475419 | [ <a href="https://www.ebi.ac.uk/ena/data/view/ERR1475419">https://www.ebi.ac.uk/ena/data/view/ERR1475419</a> ] |
| PY0101-C | ERR1475420 | [ <a href="https://www.ebi.ac.uk/ena/data/view/ERR1475420">https://www.ebi.ac.uk/ena/data/view/ERR1475420</a> ] |
| PY0103-C | ERR1475429 | [ <a href="https://www.ebi.ac.uk/ena/data/view/ERR1475429">https://www.ebi.ac.uk/ena/data/view/ERR1475429</a> ] |
| PY0105-C | ERR1475430 | [ <a href="https://www.ebi.ac.uk/ena/data/view/ERR1475430">https://www.ebi.ac.uk/ena/data/view/ERR1475430</a> ] |
| PY0107-C | ERR1475439 | [ <a href="https://www.ebi.ac.uk/ena/data/view/ERR1475439">https://www.ebi.ac.uk/ena/data/view/ERR1475439</a> ] |
| PY0114-C | ERR1475456 | [ <a href="https://www.ebi.ac.uk/ena/data/view/ERR1475456">https://www.ebi.ac.uk/ena/data/view/ERR1475456</a> ] |
| PY0117-C | ERR1475437 | [ <a href="https://www.ebi.ac.uk/ena/data/view/ERR1475437">https://www.ebi.ac.uk/ena/data/view/ERR1475437</a> ] |
| PY0119-C | ERR1475457 | [ <a href="https://www.ebi.ac.uk/ena/data/view/ERR1475457">https://www.ebi.ac.uk/ena/data/view/ERR1475457</a> ] |
| PY0120-C | ERR1475434 | [ <a href="https://www.ebi.ac.uk/ena/data/view/ERR1475434">https://www.ebi.ac.uk/ena/data/view/ERR1475434</a> ] |

---
